# Supplementary material for: D-Serine disrupts Cbln1 and GluD1 interaction and affects Cbln1-dependent synaptic effects and nocifensive responses in the central amygdala
Source: PubMed Central journal article supplement (PMC11785871; doi:10.1007/s00018-024-05554-z), 2025-01-31

**A**

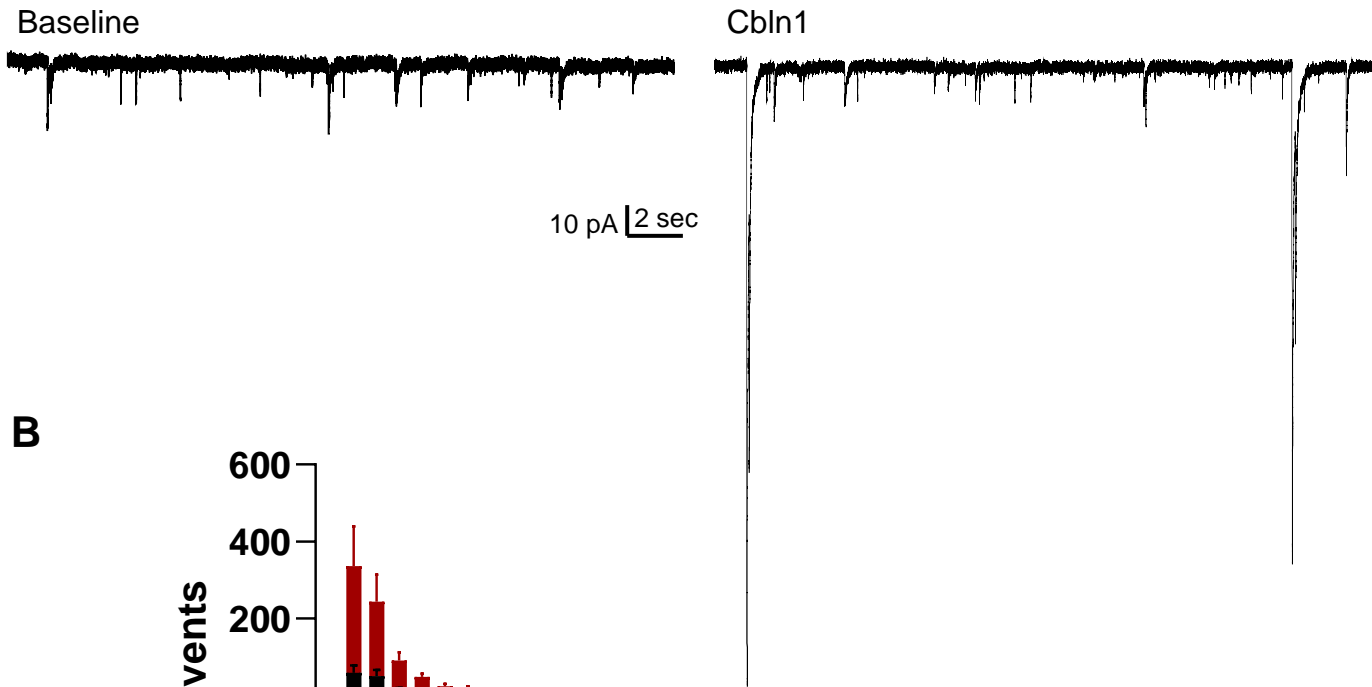

**B**

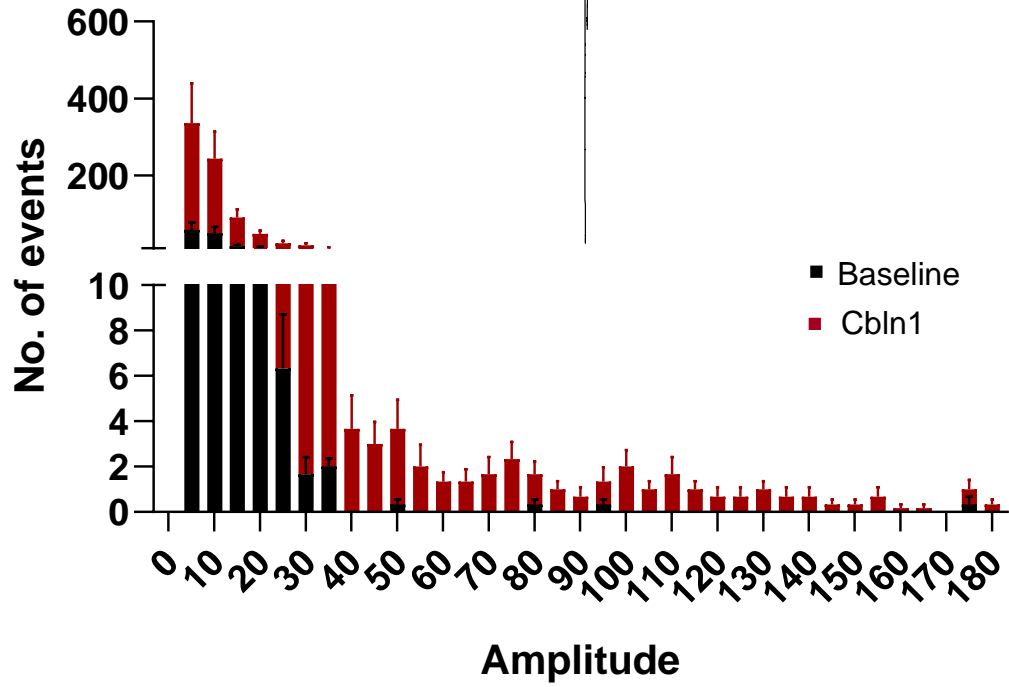

Supplement: 18_2024_5554_MOESM1_ESM.pdf [file 18_2024_5554_MOESM1_ESM.pdf]
